# Supplementary material for: Inhibition of survivin by 2′-O-methyl phosphorothioate-modified steric-blocking antisense oligonucleotides
Source: Royal Society of Chemistry journal article supplement (doi:10.1039/d4ra01925c), 2024-01-01
Supplement: d4ra01925c1.pdf [file d4ra01925c1.pdf]

Supplementary Information

# Inhibition of Survivin by 2'-O-Methyl Phosphorothioate-Modified Steric-Blocking Antisense Oligonucleotides

Yalin Li <sup>1,†</sup>, Suxiang Chen <sup>2,3,†,\*</sup>, Kamal Rahimizadeh <sup>2,3</sup>, Zhen Zhang <sup>1</sup> and Rakesh N. Veedu <sup>2,3,\*</sup>

<sup>1</sup>School of Food and Biological Engineering, Henan University of Animal Husbandry and Economy, Zhengzhou 450018, China

<sup>2</sup>Centre for Molecular Medicine and Innovative Therapeutics, Health Futures Institute, Murdoch University, Murdoch 6150, Australia

<sup>3</sup>Precision Nucleic Acid Therapeutics, Perron Institute for Neurological and Translational Science, Nedlands, WA 6009, Australia

\*Correspondence: [Suxiang.Chen@murdoch.edu.au](mailto:Suxiang.Chen@murdoch.edu.au) (S.C.); [R.Veedu@murdoch.edu.au](mailto:R.Veedu@murdoch.edu.au) (R.N.V.)

†These authors contributed equally to this work.

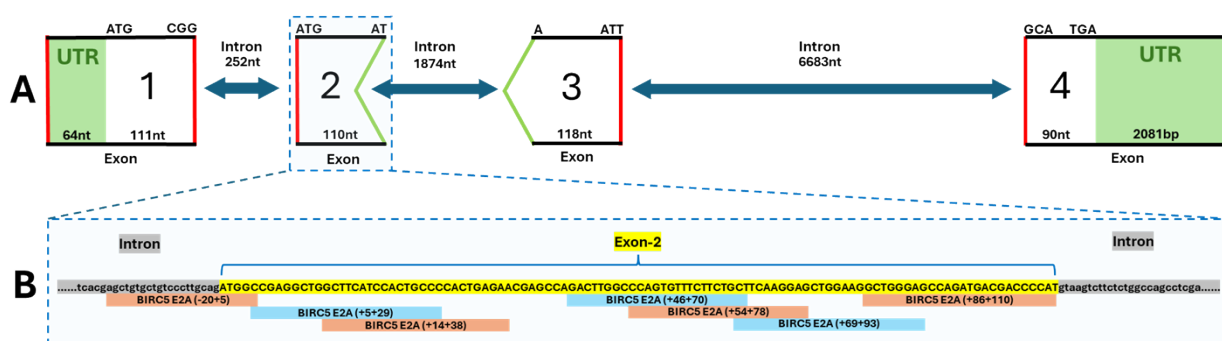

**Figure S1.** Designed ASOs targeting BIRC5. (A) Exon map of BIRC5. (B) ASOs targeting exon-2 of BIRC5. UTR: untranslated regions.



**Figure S2.** Locations of previously published BIRC5-targeting ASO sequences (yellow) and the best-performing sequences identified in the present study (red). The lowercase italic letters represent untranslated region (UTR) in *BIRC5* mRNA.

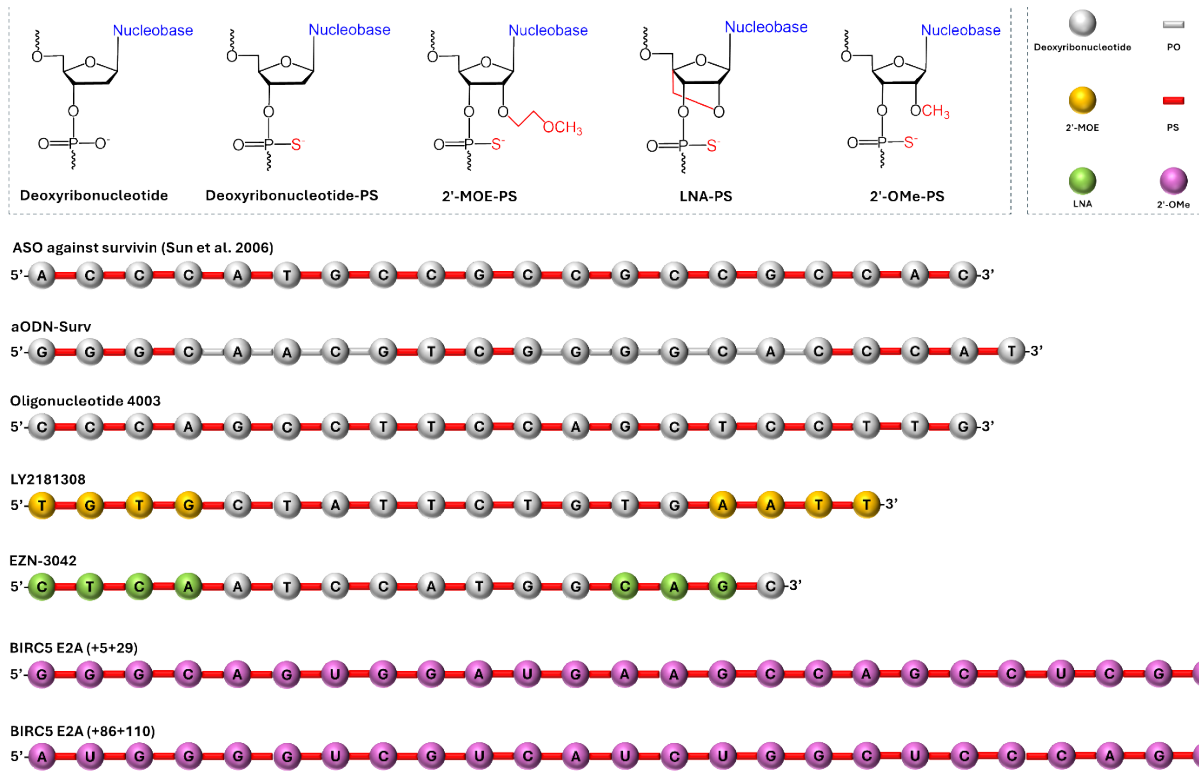

**Figure S3.** Chemistry of previously published BIRC5-targeting ASOs and the best-performing ASOs identified in the present study. PO, phosphodiester; PS, phosphorothioate; 2'-MOE, 2'-O-methoxyethyl; LNA, locked nucleic acid; 2'-OMe, 2'-O-methyl.

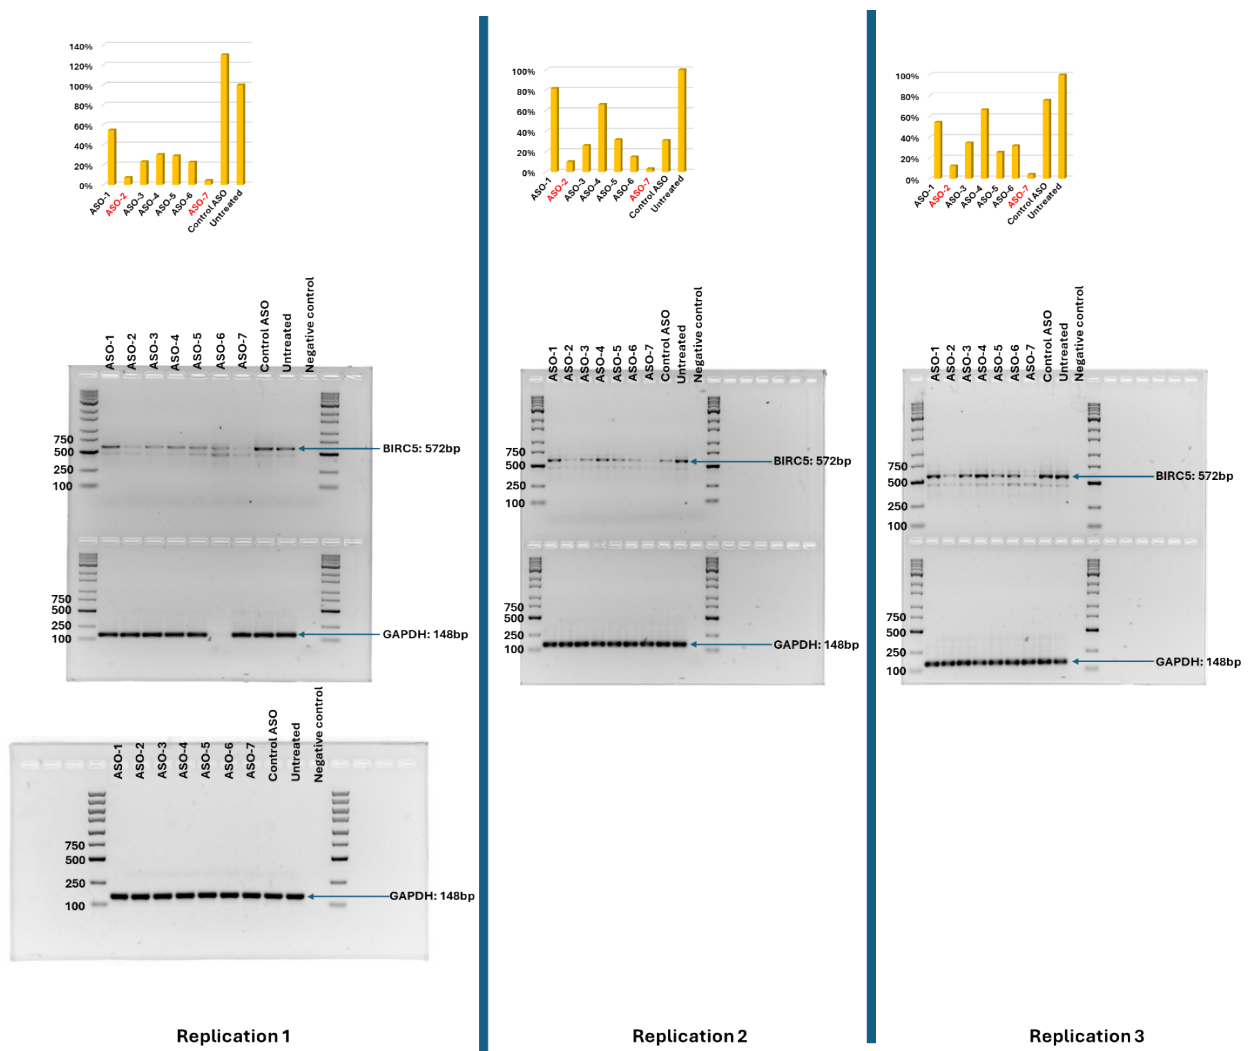

**Figure S4.** Original gel images and individual densitometry analysis of each image of the initial screening of seven BIRC5-ASOs. The transfection was repeated three times. The PCR of replication 1 was repeated twice using *GAPDH* primers due to an error occurred when preparing PCR using ASO-6 treated sample as template.

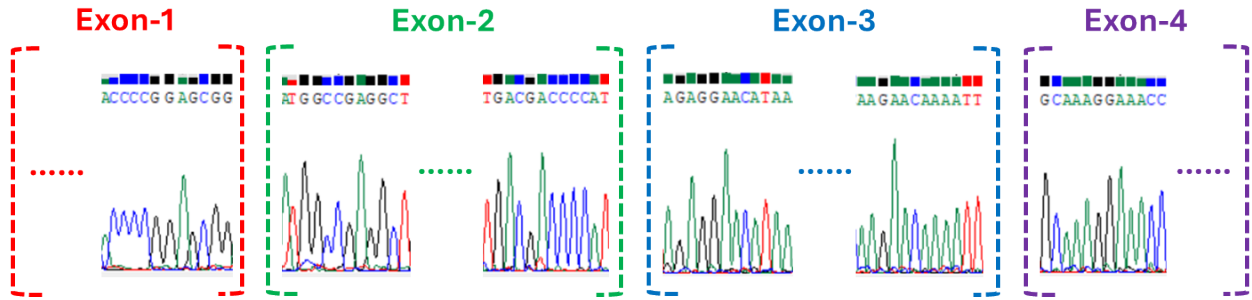

**Figure S5.** Sequencing results showed the successful expression of *BIRC5* transcript containing four exons (NM\_001168.3).

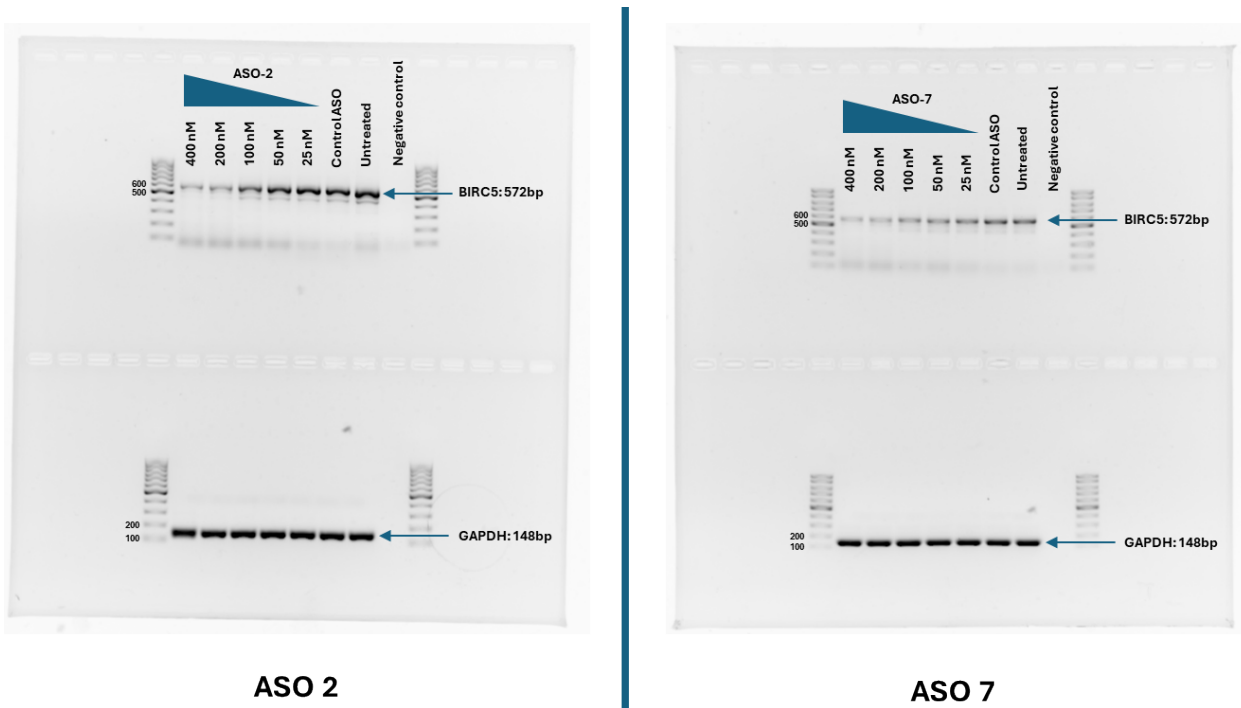

**Figure S6.** Original gel images of the dose-response assay of ASO-2 and ASO-7. Left panel: ASO-2; right panel: ASO-7. Doses of ASO-2 and ASO-7 included 400, 200, 100, 50, and 25 nM; and the doze of control ASO was 400 nM.

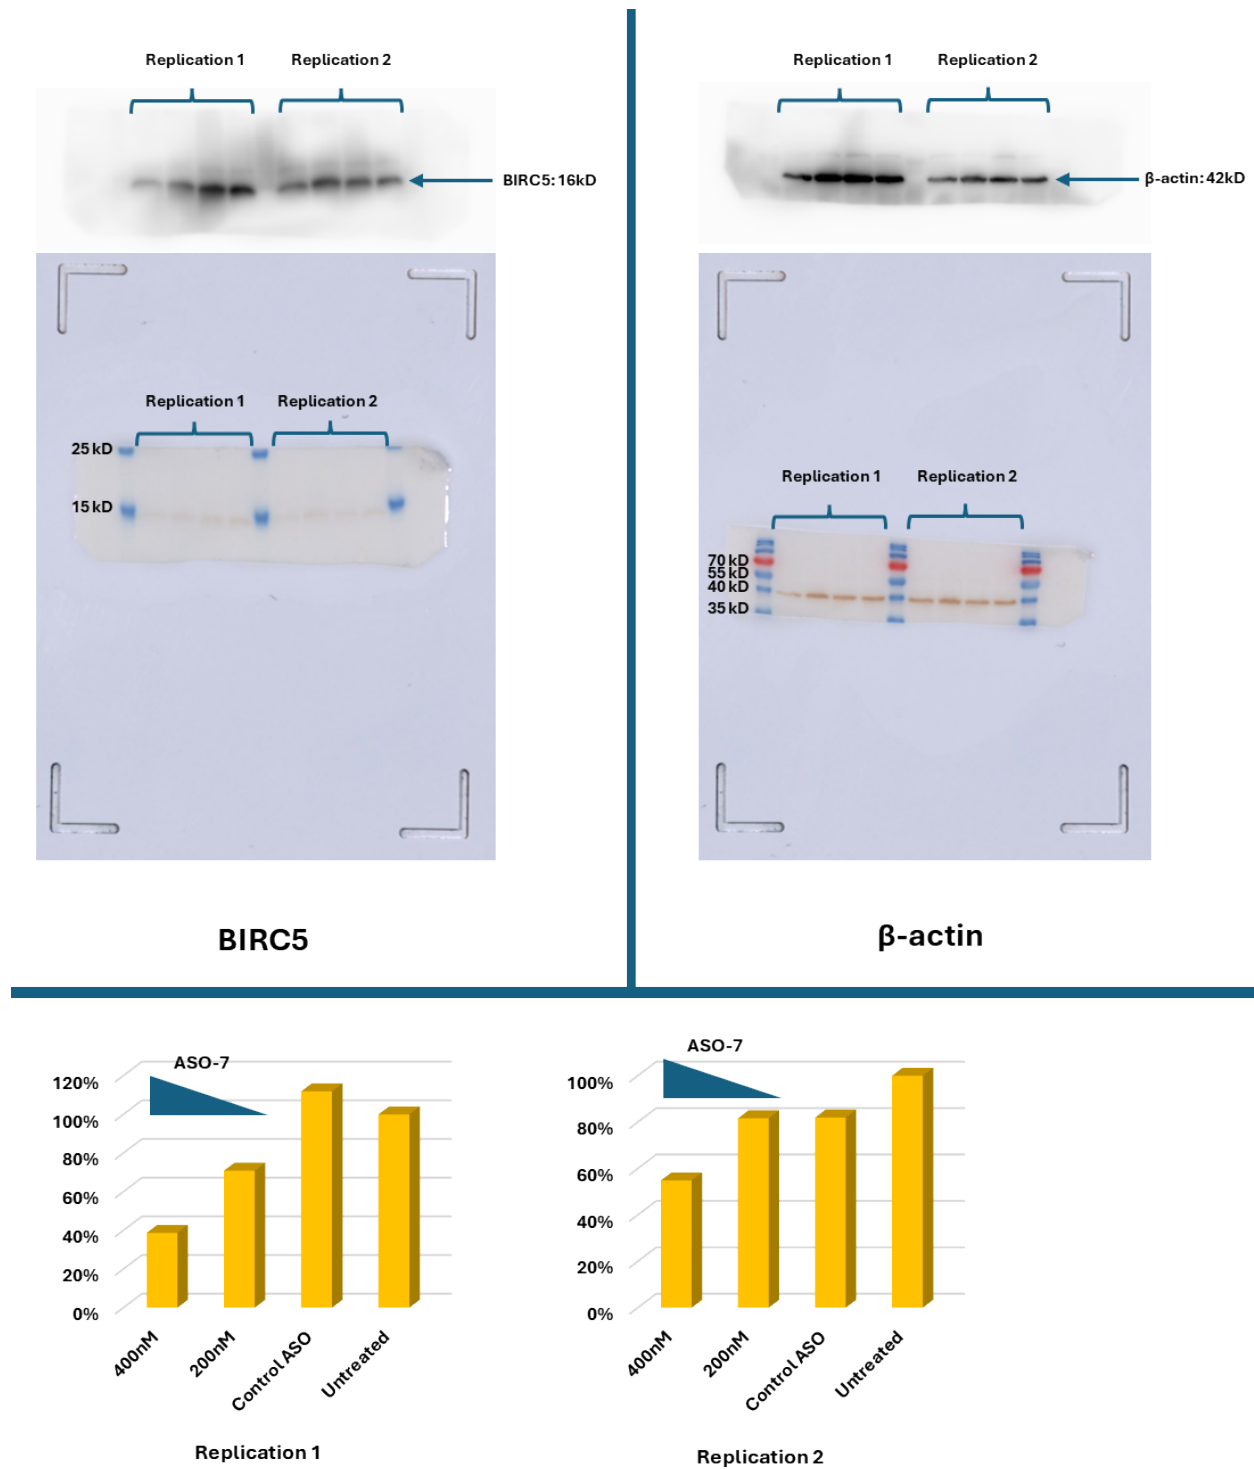

**Figure S7.** Original membrane images of the western blots of ASO-7. The experiment was repeated two times. Up-left panel: membrane images of BIRC5 blots; up-right panel: membrane images of beta-actin blots; down panel: individual densitometry analysis of the western blots. Doses of ASO-7 treatment included 400 and 200 nM; and the doze of control ASO was 400 nM.

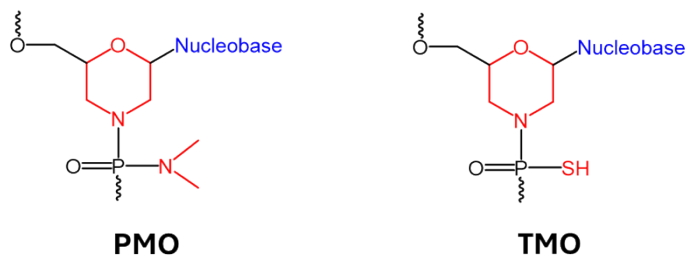

**Figure S8.** Structure of PMO and TMO analogue. PMO: phosphorodiamidate morpholino oligomer, TMO: thiomorpholino oligonucleotide.
